# Supplementary material for: Comparison of the efficacy of 12 interventions in the treatment of diabetic foot ulcers: a network meta-analysis
Source: PeerJ. 2025 Aug 11;13:e19809. doi: 10.7717/peerj.19809 (PMC12352421; doi:10.7717/peerj.19809)
Supplement: Supplemental Information 5 [file peerj-13-19809-s005.xlsx]

## Sheet: Wound healing rate
Study	id	t	n	r
Jain 2011	1	1	23	7
	1	2	25	10
Uzun 2021	2	1	10	8
	2	2	10	9
Han 2010	3	1	26	16
	3	2	26	26
Ozturk 2012	4	1	8	0
	4	2	9	6
Huang 2005	5	1	18	7
	5	2	18	14
Lu 2011	6	1	21	11
	6	2	22	21
Lu 2008	7	1	20	9
	7	2	18	15
You 2012	8	1	26	18
	8	2	20	20
Haze 2021	9	1	10	1
	9	3	10	5
Kaviani 2011	10	1	9	3
	10	3	13	8
Naidu 2005	11	1	8	0
	11	3	8	1
Minatel 2009	12	1	11	1
	12	3	12	7
Ortíz 2014	13	1	9	6
	13	3	9	7
	13	8	10	8
Bhansali 2009	14	1	10	10
	14	4	10	10
Ma 2015	15	1	23	13
	15	4	23	12
Samuel 2016	16	1	17	13
	16	4	18	18
Wieman 1998	17	1	127	44
	17	4	255	109
Steed 1995	18	1	57	14
	18	4	61	29
Khandelwal 2013	19	1	20	8
	19	4	20	16
	19	11	20	12
Jaiswal 2010	20	1	25	18
	20	4	25	15
Agrawal 2009	21	1	14	3
	21	4	14	9
Blume 2011	22	1	16	5
	22	4	66	27
Afshari 2005	23	1	20	2
	23	5	30	7
Fern´andez‐Montequ´ın 2009	24	1	48	25
	24	5	101	65
Gomez-Villa 2014	25	1	17	0
	25	5	17	4
Oliveira 2021	26	1	11	1
	26	5	14	3
Park 2018	27	1	85	43
	27	5	82	60
Singla 2014	28	1	25	11
	28	5	25	23
Tsang 2003	29	1	19	17
	29	5	42	41
Viswanathan 2020	30	1	23	12
	30	5	27	21
Moretti 2009	31	1	15	5
	31	6	15	8
Omar 2014	32	1	21	6
	32	6	24	13
Snyder 2020	33	1	164	30
	33	6	172	65
Vangaveti 2023	34	1	23	6
	34	6	25	5
Wang 2009	35	11	36	8
	35	6	36	11
Wang 2011	36	11	40	10
	36	6	44	24
Lázaro Martínez 2020	37	1	24	20
	37	7	27	23
Rastogi 2019	37	1	26	3
	38	7	34	8
Michailidis 2018	39	1	6	5
	39	7	8	5
Ennis 2005	40	1	28	4
	40	7	27	11
Fattah 2018	41	1	23	4
	41	7	23	10
Peters 2001	42	1	20	7
	42	8	20	13
Lundeberg 1992	43	1	32	4
	43	8	32	10
Baker 1997	44	1	53	22
	44	8	61	23
Anjum 2022	45	1	20	13
	45	9	20	20
Blume 2008	46	1	166	48
	46	9	169	73
Maranna 2021	47	1	23	6
	47	9	22	20
Seidel 2022	48	1	110	56
	48	9	44	36
Seidel 2020	49	1	174	21
	49	9	171	25
Nain 2011	50	1	15	9
	50	9	15	12
Ahmed 2017	51	1	28	19
	51	10	28	24
Driver 2006	52	1	32	9
	52	10	40	13
Elsaid 2020	53	1	12	0
	53	10	12	3
Gowsick 2023	54	1	87	35
	54	10	87	54
Gupta 2021	55	1	30	5
	55	10	30	6
Hossam 2022	56	1	40	28
	56	10	40	38
Singh 2018	57	1	26	26
	57	10	29	29
Xie 2019	58	1	25	20
	58	10	25	24
Li 2015	59	1	55	37
	59	10	48	41
Orban 2022	60	1	36	23
	60	10	36	31
Abidia 2003	61	1	8	0
	61	11	8	5
Kessler 2003	62	1	13	0
	62	11	14	2
Santema 2018	63	1	60	28
	63	11	60	30
Londah 2010	64	1	42	12
	64	11	48	25
Fedorko 2016	65	1	54	12
	65	11	49	10
Kumar 2020	66	1	26	0
	66	11	28	22
Duzgun 2008	67	1	50	0
	67	11	50	33
Salama 2019	68	1	15	3
	68	11	15	10
Chen 2017	69	1	18	1
	69	11	20	5
Serena 2021	70	1	64	18
	70	12	81	36
He 2021	71	1	40	17
	71	12	40	29
Niederauer 2018	72	1	72	12
	72	12	74	24
Frykberg 2021	73	1	37	10
	73	12	36	20
Al-Jalodi 2022	74	1	64	18
	74	12	81	36
Driver 2017	75	1	63	31
	75	12	65	35
Yu 2016	76	1	10	3
	76	12	10	9
Niederauer 2015	77	1	21	8
	77	12	21	11
Niederauer 2017	78	1	50	11
	78	12	50	23
Didomenico 2018	79	1	40	13
	79	13	40	34
Game 2021	80	1	16	1
	80	13	15	4
Lavery 2014	81	1	47	10
	81	13	50	31
Mobajeri-Tehrani 2016	87	1	30	5
	87	13	27	11
Serena 2019	88	1	38	11
	88	13	38	22
Snyder 2016	89	1	14	0
	89	13	15	5
Tettelbach 2019a	90	1	56	28
	90	13	54	38
Zelen 2015	91	1	20	7
	91	13	20	19
Zelen 2013	92	1	12	1
	92	13	13	12
Zelen 2016	93	1	35	18
	93	13	32	31
Tettelbach 2019b	94	1	54	29
	94	13	101	74
Thompson 2019	95	1	6	5
	95	13	7	6

## Sheet: Wound healing time
Study	id	t	mean	sd	n
Uzun 2021	1	1	54.8	15	10
	1	2	31	10.7	10
Han 2010	2	1	42.1	9.5	26
	2	2	33.8	11.6	26
Bhansali 2009	3	1	86.1	30.71	10
	3	4	50.1	23.38	10
Khandelwal 2013	4	1	47.25	18.55	20
	4	4	53.2	17.71	20
Afshari 2005	5	1	28.9	15.1	20
	5	5	29.6	20.95	30
Xu 2018	6	1	41.5	0.36	49
	6	5	35.5	0.27	50
Zhang 2021	7	1	47.52	1.82	40
	7	5	38.51	1.46	40
Viswanathan 2020	8	1	72	18	23
	8	5	45	12	27
Moretti 2009	9	1	82.2	4.7	15
	9	6	60.8	4.7	15
Omar 2014	10	1	81.17	4.35	19
	10	6	64.5	8.06	19
Michailidis 2018	11	1	61.6	24.4	6
	11	7	117.6	40.3	8
Ennis 2005	12	1	82.18	1.54	28
	12	7	63.84	4.06	27
Lázaro Martínez 2020	13	1	103.6	86.1	24
	13	7	67.9	26.6	27
Anjum 2022	14	1	10.6	5.5	20
	14	9	7.5	2.82	20
Karatepe 2016	15	1	37.1	9.8	37
	15	9	29.4	13.3	30
Maranna 2021	16	1	44.57	9.29	23
	16	9	14.82	7.3	22
Seidel 2022	17	1	62	37.4	110
	17	9	33.9	30.6	44
Driver 2006	18	1	47.4	22	32
	18	10	42.9	18.3	40
Elsaid 2020	19	1	72.8	11.9	12
	19	10	44.1	14.7	12
Singh 2018	20	1	60.6	3.7	29
	20	10	36.7	3	26
Xie 2019	21	1	48.13	11.721	23
	21	10	19.36	7.239	25
Orban 2022	22	1	94.36	23.59	36
	22	10	76.3	23.8	36
Alamdari 2021	23	1	80	11.4	47
	23	10	55	10.4	43
Frykberg 2021	24	1	44.1	13.3	37
	24	12	57.4	29.4	36
He 2021	25	1	76.42	32.78	40
	25	12	48.39	13.32	40
Didomenico 2018	26	1	67.3	32.2	40
	26	13	37	23.3	40
Zelen 2016	27	1	57.4	26.8	35
	27	13	23.6	18.4	32
Zelen 2013	28	1	35	0	12
	28	13	17.5	13.3	13

## Sheet: PAR
Study	id	t	mean	sd	n
Haze 2021	1	1	16.7	110.4	10
	1	3	84.6	24.4	10
Santos 2018	2	1	51.29	31.61	9
	2	3	76.45	18.3	9
Kaviani 2011	3	1	47.3	15.4	10
	3	3	73.7	10.2	13
Minatel 2009	4	1	43.3	34.52	11
	4	3	90.8	4.94	12
Nossair 2013	5	1	48.7	31.7	20
	5	6	83.3	27.4	20
Jeppesen 2016	6	1	5.6	21.4	12
	6	6	34.5	14.9	11
Omar 2014	7	1	63.31	24.87	19
	7	6	83.32	20.68	19
Rastogi 2019	8	1	59.6	24.9	26
	8	7	69.4	23.2	34
Fattah 2018	9	1	73.34	17.64	23
	9	7	82.25	24.69	23
Gowsick 2023	10	1	65.47	30.18	87
	10	10	86.51	15.71	87
Gupta 2021	11	1	81.72	17.2	30
	11	10	85.98	13.42	30
Kessler 2003	12	1	41.7	27.3	13
	12	11	48.1	30.3	14
Fedorko 2016	13	1	50	45.38	54
	13	11	50	39.59	49
He 2021	14	1	45.79	33.21	40
	14	12	63.13	14.61	40
Serena 2021	15	1	70.18	45.5	64
	15	12	40.44	72.1	81

## Sheet: Amputation rate
Study	id	t	n	r
Uzun 2021	1	1	10	2
	1	2	10	1
Huang 2005	2	1	24	5
	2	2	23	0
Mohammadzadeh 2013	3	1	14	7
	3	2	7	0
Lu 2011	4	1	37	6
	4	2	37	0
Lu 2008	5	1	23	3
	5	2	22	0
Haze 2021	6	1	10	2
	6	3	10	0
Kaviani 2011	7	1	10	2
	7	3	13	0
Fern´andez‐Montequ´ın 2009	8	1	48	12
	8	5	101	17
Tsang 2003	9	1	19	2
	9	5	42	2
Blume 2008	10	1	166	17
	10	9	169	7
Seidel 2022	11	1	110	21
	11	9	44	10
Seidel 2020	12	1	174	36
	12	9	171	31
Alamdari 2021	13	1	30	12
	13	9	30	7
Hossam 2022	14	1	40	4
	14	10	40	0
Singh 2018	15	1	26	2
	15	10	29	0
Faglia 1996	16	1	33	11
	16	11	35	3
Abidia 2003	17	1	8	1
	17	11	8	2
Santema 2018	18	1	60	29
	18	11	60	22
Londah 2010	19	1	37	5
	19	11	38	7
Fedorko 2016	20	1	54	26
	20	11	49	25
Kumar 2020	21	1	26	15
	21	11	28	2
Duzgun 2008	22	1	50	41
	22	11	50	4
Salama 2019	23	1	15	1
	23	11	15	1
Chen 2017	24	1	18	2
	24	11	20	1
He 2021	25	1	40	6
	25	12	40	0
Frykberg 2021	26	1	37	3
	26	12	36	2
Al-Jalodi 2022	27	1	64	1
	27	12	81	0
Game 2021	28	1	16	1
	28	13	15	0
Lavery 2014	29	1	47	1
	29	13	50	0
Mobajeri-Tehrani 2016	30	1	30	5
	30	13	27	2
